# Supplementary material
Source: PubMed Central journal article supplement (PMC4085528)

Adenocarcinoma  
(Ski-negative)

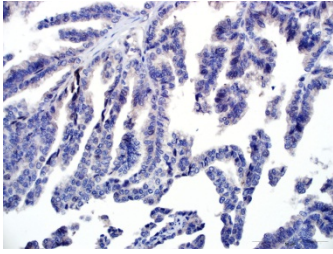

Adenocarcinoma  
(Ski-positive)

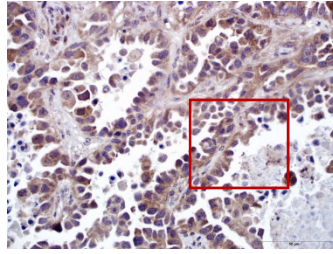

Adenocarcinoma  
(Ski-positive)

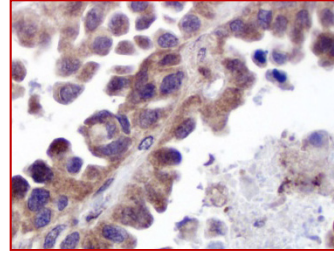

Bronchioloalveolar carcinoma  
(Ski-negative)

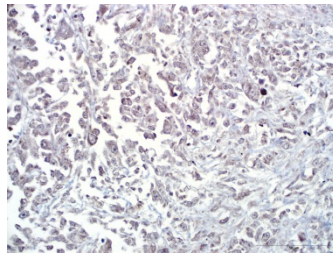

Large cell carcinoma  
(Ski-negative)

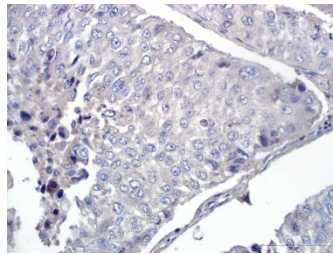

Squamous cell carcinoma  
(Ski-negative)

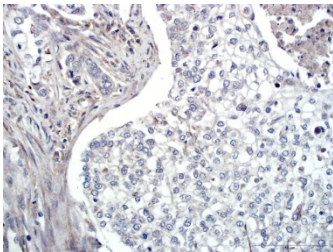

Squamous cell carcinoma  
(Ski-positive)

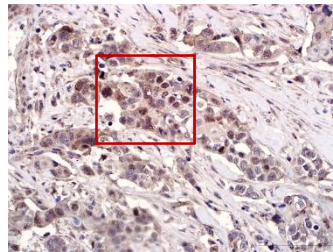

Squamous cell carcinoma  
(Ski-positive)

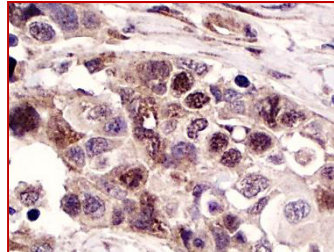

Atypical carcinoid  
(Ski-negative)

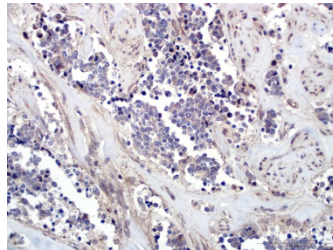

Atypical carcinoid  
(Ski-positive)

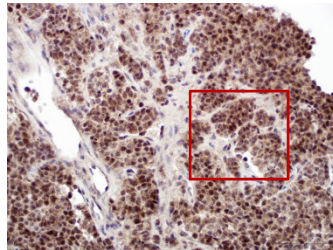

Atypical carcinoid  
(Ski-positive)

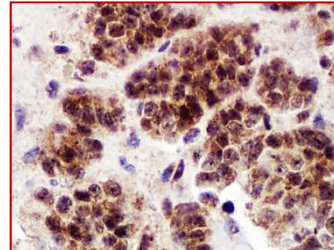

Normal lung  
(Ski-negative)

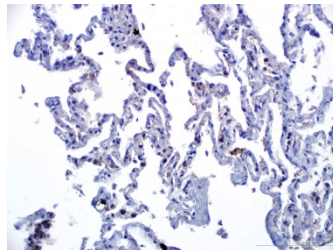

Small cell lung carcinoma  
(Ski-positive)

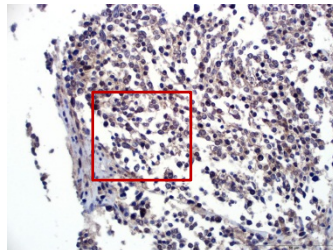

Small cell lung carcinoma  
(Ski-positive)

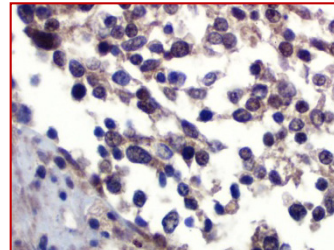

Supplement: cdd201438x8.pdf [file cdd201438x8.pdf]
