# Supplementary material
Source: PubMed Central journal article supplement (PMC4085528)
Supplement: cdd201438x10.pdf [file cdd201438x10.pdf]

**Supplemental Table 1.** Differential expression of Ski-regulated genes in KrasG12D-induced lung carcinomas.

| <b>Up-regulated genes (SCC vs. ADC)</b>   |                                                                                      |
|-------------------------------------------|--------------------------------------------------------------------------------------|
| Category                                  | Gene symbol                                                                          |
| Regulation of cell development            | <i>Krt13, Krt15, Krt23, Tnik, Ptpnz1, Xist, Hoxd13, Foxj3, Tbx22</i>                 |
| Regulation of cell proliferation          | <i>Mela, Pkmyt1, Serpinf1, Sfrp1, Hoxd13, Flcn, Abce1, Dusp12, Braf, Mapk4</i>       |
| Transcription regulation                  | <i>Barx2, Hoxd13, Foxj3, Tbx22, Atrx, Bcl11b, Rreb1, Nanog</i>                       |
| Cell adhesion                             | <i>Barx2, Tnik, Ppfbp2, Itga2b, Itga6</i>                                            |
| Cytoskeleton organization                 | <i>Krt13, Krt15, Krt23, Aipl1, Sprr2h, Sprr2g</i>                                    |
| Cell-cell signaling                       | <i>Serpinf1, Il1rn, Tmtc2, Sfrp1</i>                                                 |
| Signal transduction                       | <i>Pkmyt1, Ptpnz1, Tnik, Impa1, Flcn, Rab39b, Dusp12, Braf, Itga2b, Itga6, Mapk4</i> |
| Cell death/survival                       | <i>Gsta2, Ltf</i>                                                                    |
| Cell metabolism                           | <i>Gsta2, Ltf, Ugt1s6b, Idi1, Abca12, Ywhaz, Nars2, Aoc2, Qpct, Ugt1a6a</i>          |
| <b>Down-regulated genes (SCC vs. ADC)</b> |                                                                                      |
| Category                                  | Gene symbol                                                                          |
| Regulation of cell development            | <i>Wnt10b, Fstl1, Ulk2, Mea1, Gas7</i>                                               |
| Regulation of cell proliferation          | <i>Cdk14, Fstl1, Mus81, Gdf15, Mapk12, Cbfa2t2, Prkd1, Jun1</i>                      |
| Transcription regulation                  | <i>Nat8l, Cnot3, Jun1</i>                                                            |
| Cell adhesion                             | <i>Lox, Mmp10, Mmp11, CD97, Ncam1, Antxr2</i>                                        |
| Cytoskeleton organization                 | <i>Tppp3, Copz2, Add1</i>                                                            |
| Cell-cell signaling                       | <i>Wnt10b, Vegfc, Gdf15</i>                                                          |
| Signal transduction                       | <i>Rgs3, Plekhg2, Shc1, Ulk2, Akap2, Mapk12, Rrad, Git2, Rnf41, Prkd1</i>            |
| Cell death/survival                       | <i>Egln1</i>                                                                         |
| Cell metabolism                           | <i>Chst2, Mettl8, St6galnac4, Sc5d, Pemt, Degs2, Nme4, Acot9, Sgms2</i>              |
