# Supplementary material
Source: PubMed Central journal article supplement (PMC4085528)

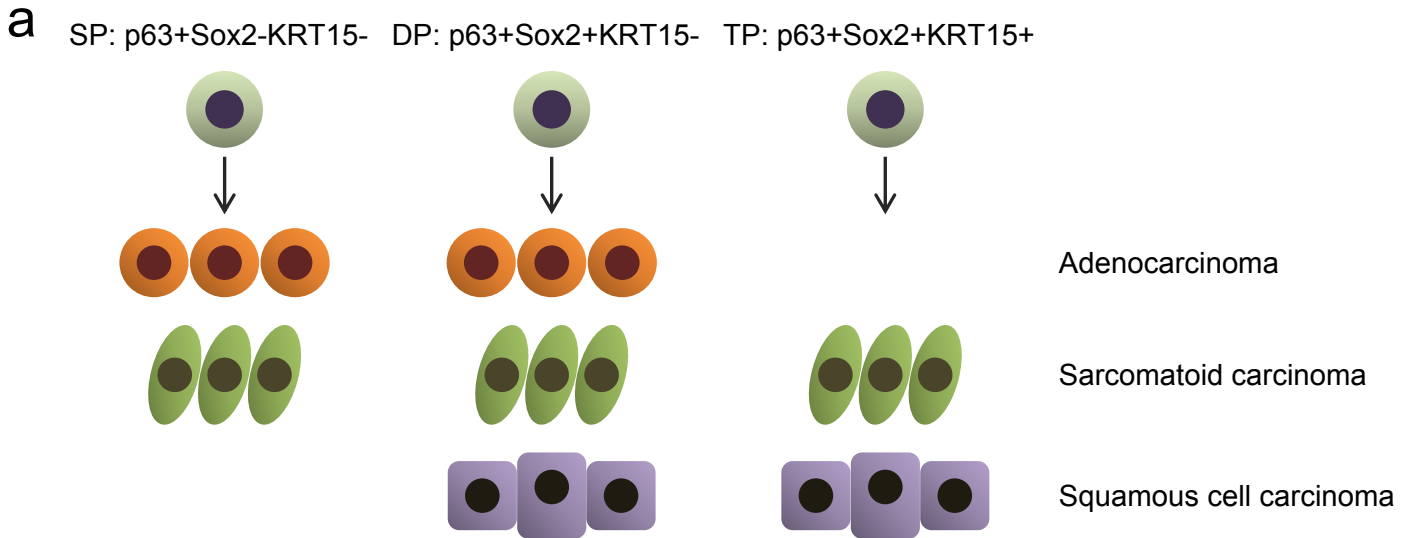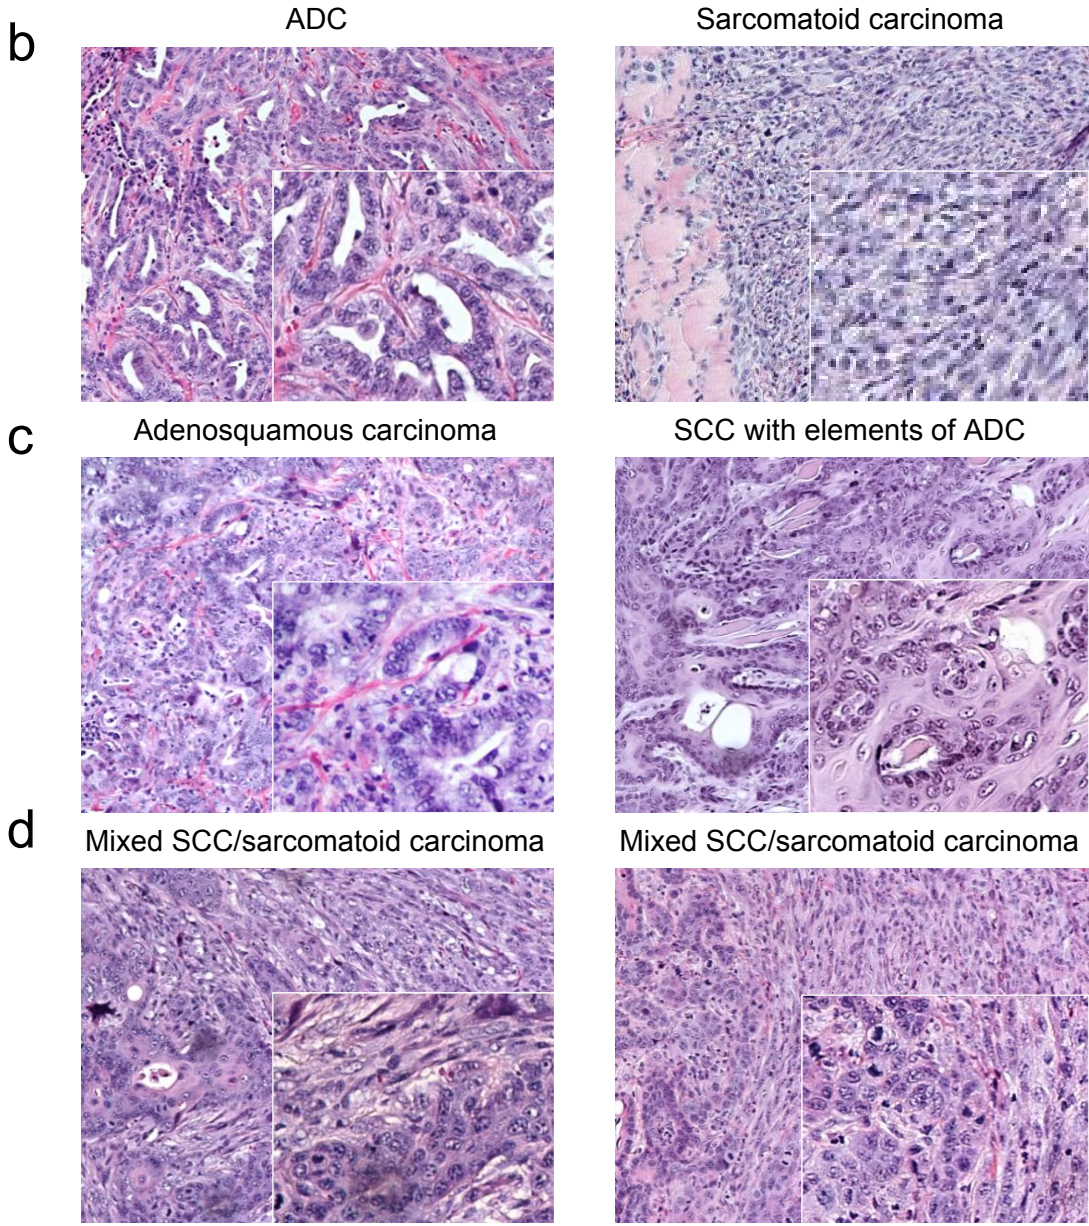

Supplement: cdd201438x4.pdf [file cdd201438x4.pdf]

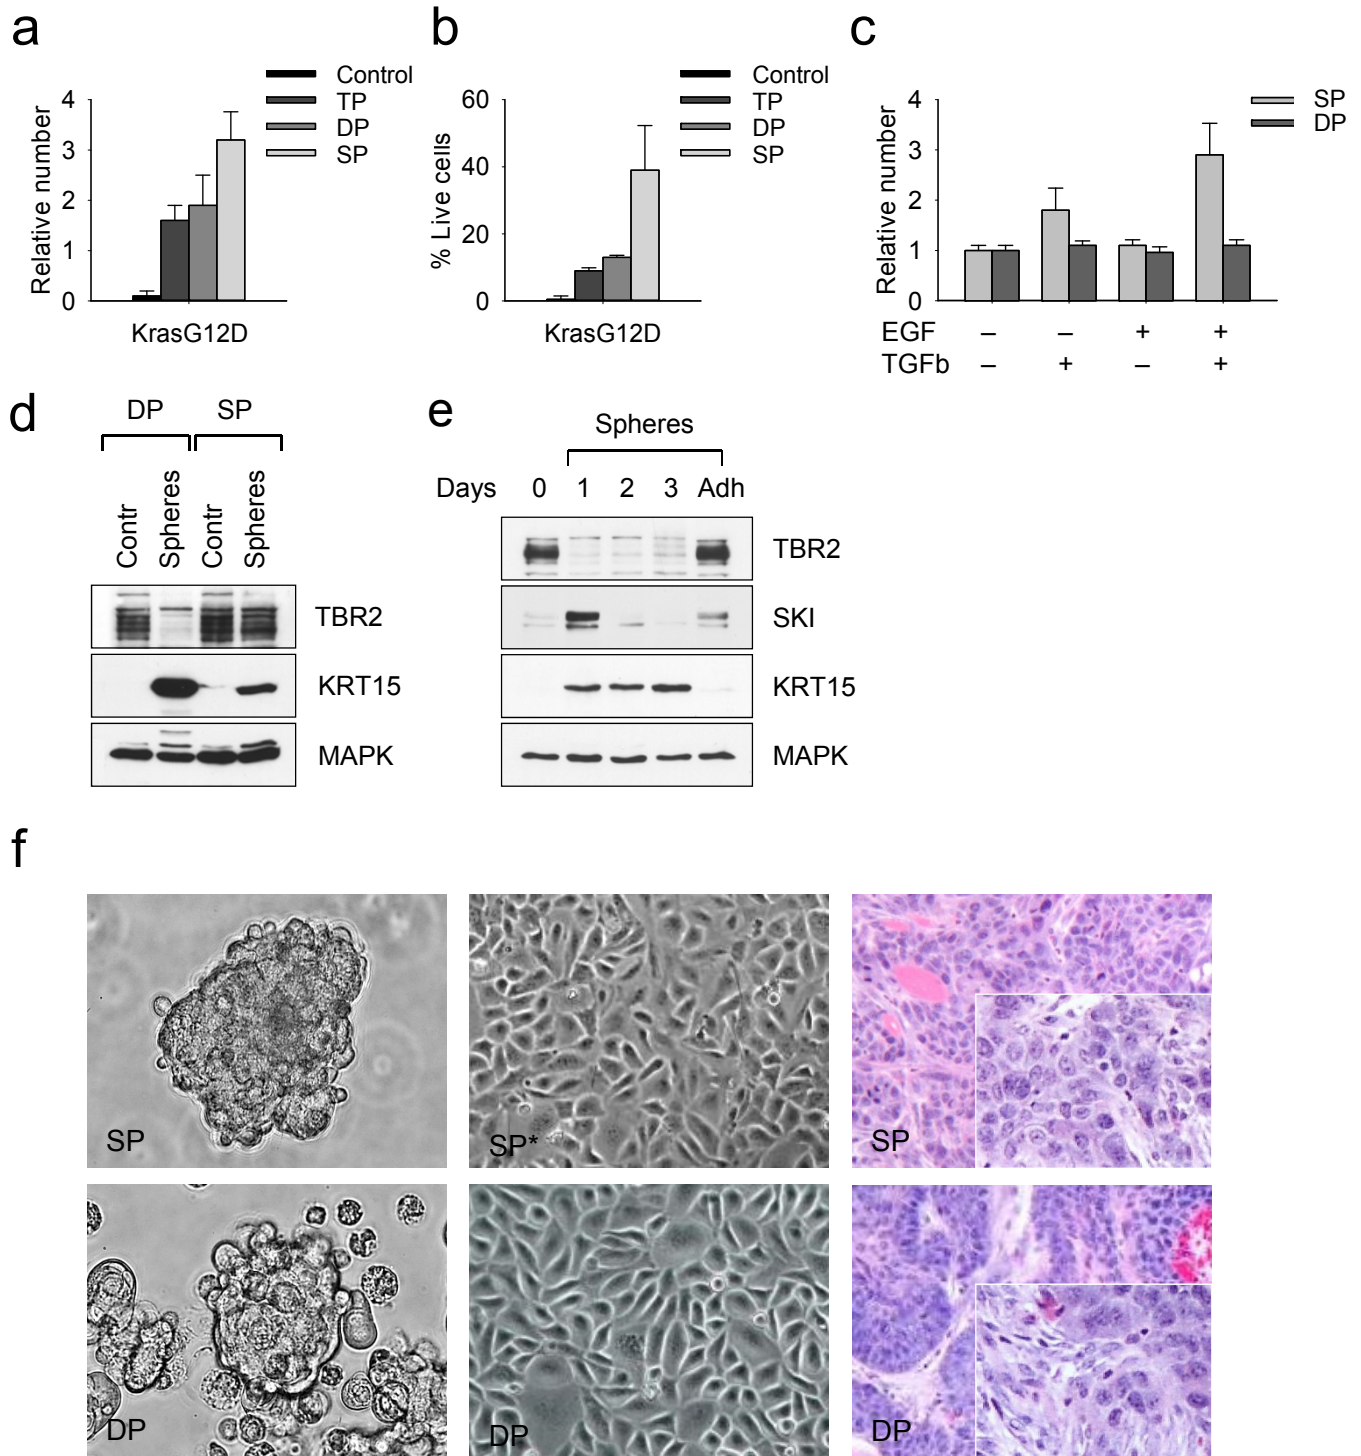

Supplement: cdd201438x5.pdf [file cdd201438x5.pdf]

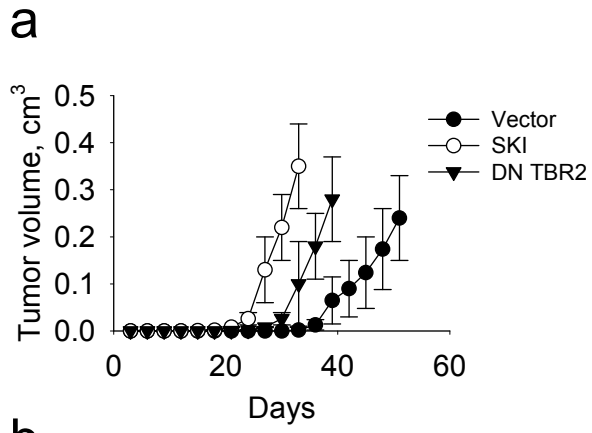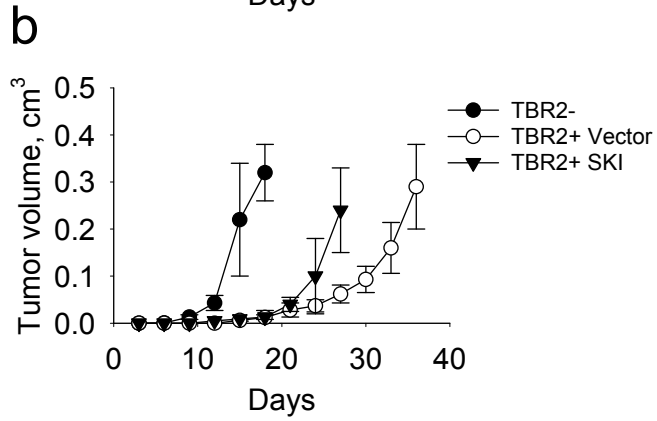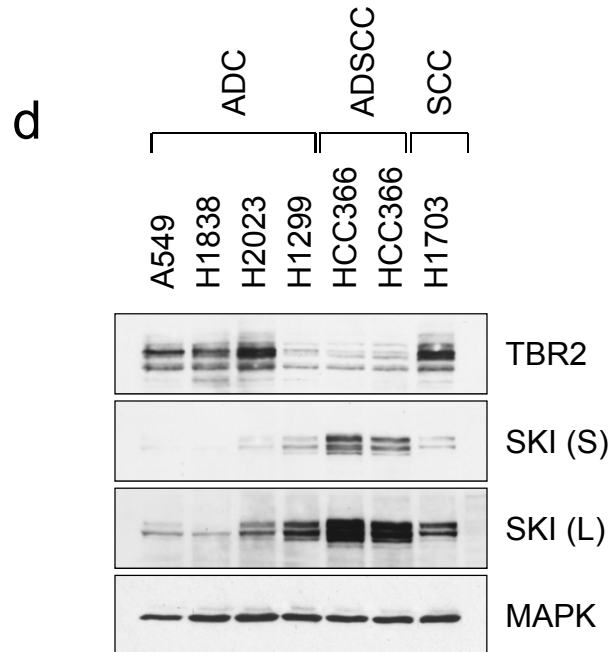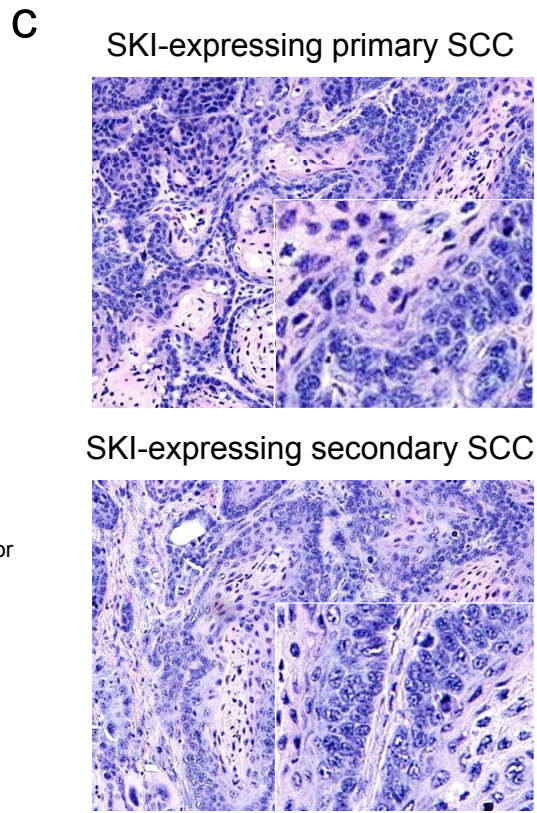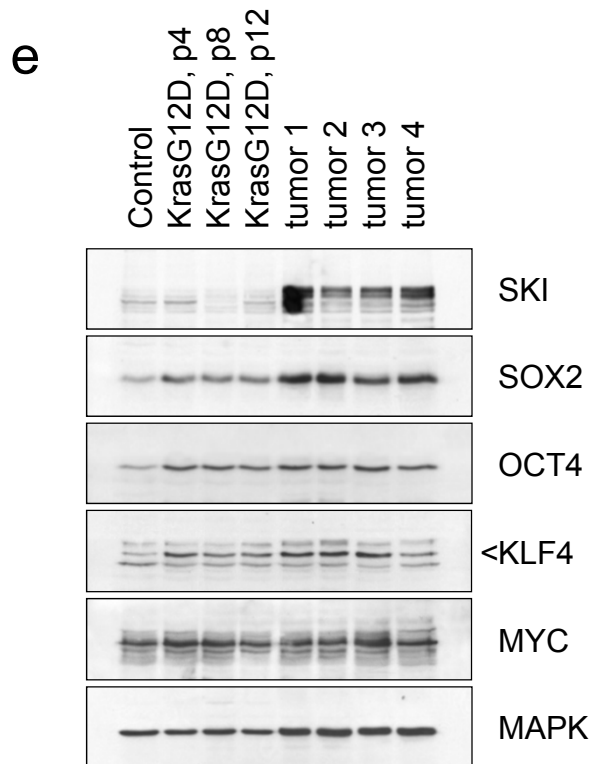

Supplement: cdd201438x7.pdf [file cdd201438x7.pdf]
